# Supplementary material for: Intrinsic ferromagnetism with high Curie temperature in two dimensional XCrY3 (X = Al, Ga, In; Y = S, Se, Te) monolayers
Source: Royal Society of Chemistry journal article supplement (doi:10.1039/d3tc04157c), 2024-01-01
Supplement: d3tc04157c1.pdf [file d3tc04157c1.pdf]

Supplemental materials for **“Intrinsic Ferromagnetism with High Curie Temperature in Two Dimensional  $X\text{CrY}_3$  ( $X = \text{Al, Ga, In}$ ;  $Y = \text{S, Se, Te}$ ) Monolayers.”**

In this Supplemental Material we provide (1) the phonon spectra and the MD simulation results for all  $X\text{CrY}_3$  ( $X=\text{Al, Ga, In}$ ;  $Y=\text{S, Se, Te}$ ) monolayers, (2) the electronic band structures and PDOSs of all  $X\text{CrY}_3$  monolayers, (3) the top and side view of deformation charge density distribution of the  $\text{AlCrS}_3$  monolayer, (4) the orbital-projected contribution to MAE from the SOC interaction, (5) Magnetic moment and specific heat capacity as a function of temperature by Monte Carlo simulations, and (6) the total energies per cell of monolayer  $X\text{CrY}_3$  with different magnetic configurations at the GGA+ U level.

Figures S1 and S2 shows that the studied  $X\text{CrY}_3$  monolayers are kinetically and dynamically stable.

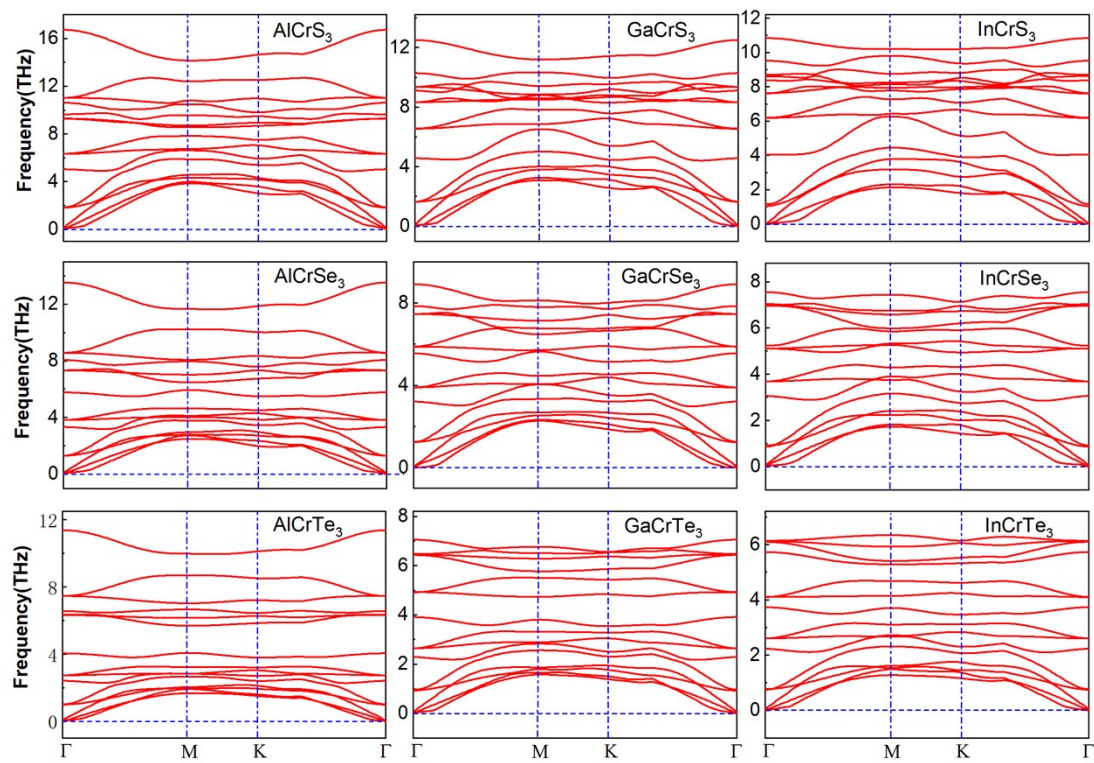

**Figure S1.** The phonon spectra of all  $X\text{CrY}_3$  ( $X=\text{Al, Ga, In}$ ;  $Y=\text{S, Se, Te}$ ) monolayers.

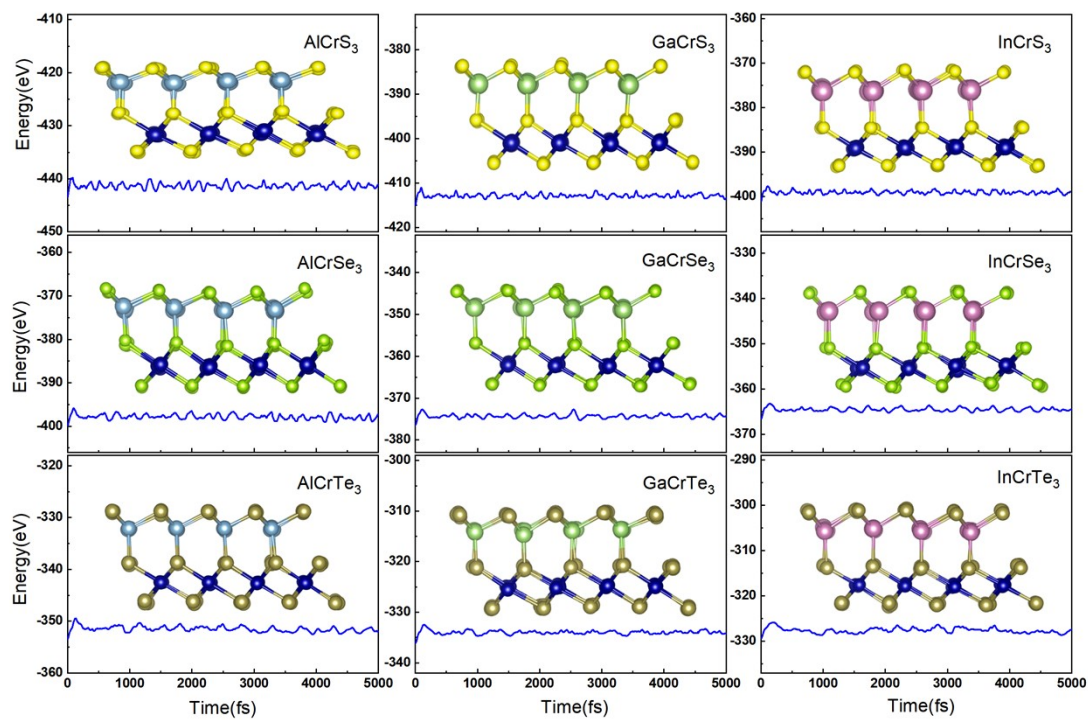

**Figure S2.** Results of molecular dynamicssimulations of all  $XCrY_3$  ( $X=Al, Ga, In$ ;  $Y=S, Se, Te$ ) monolayers , as well as the final structures after being heated at 300K for 5ps inserted.

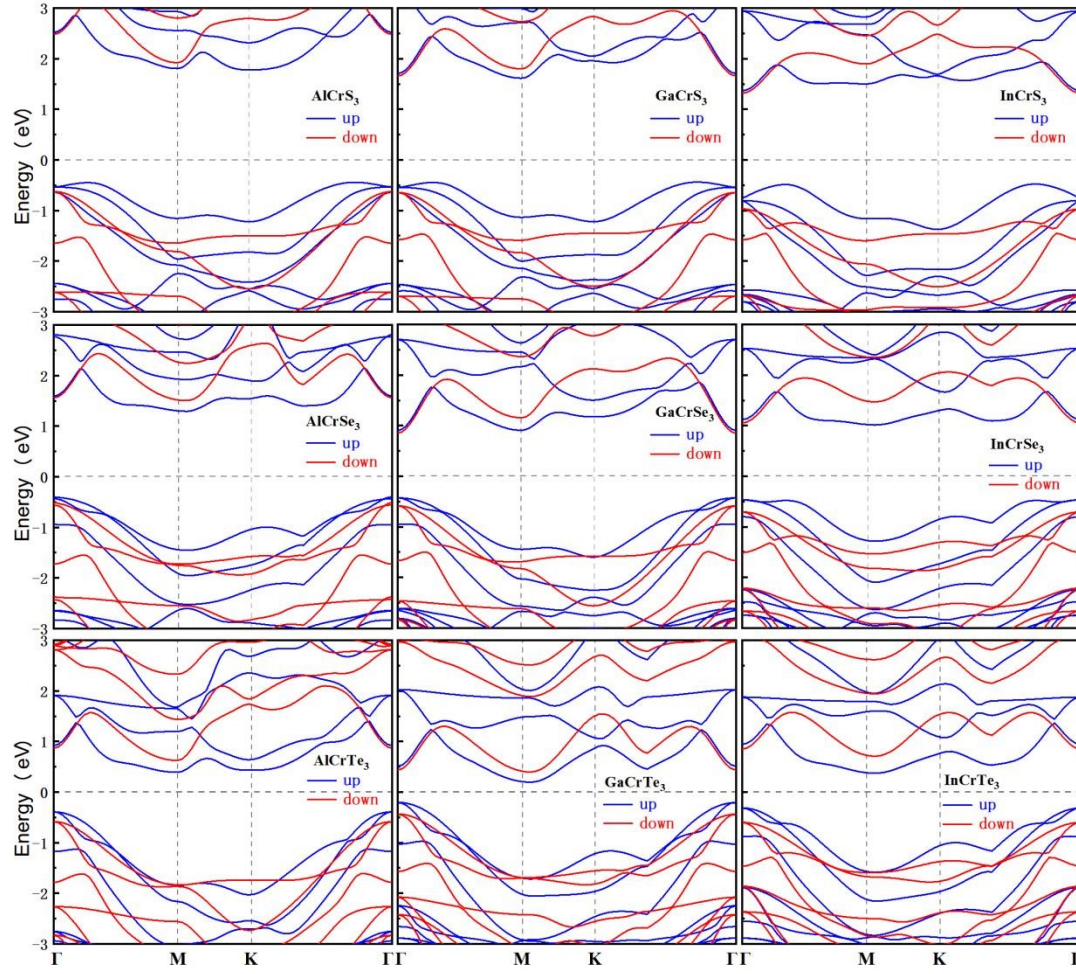

**Figure S3.** Band structures of all  $X\text{Cr}Y_3$  ( $X=\text{Al, Ga, In}$ ;  $Y=\text{S, Se, Te}$ ) monolayers under HSE06 calculation methods. Blue and red lines represent up and down spin, respectively.

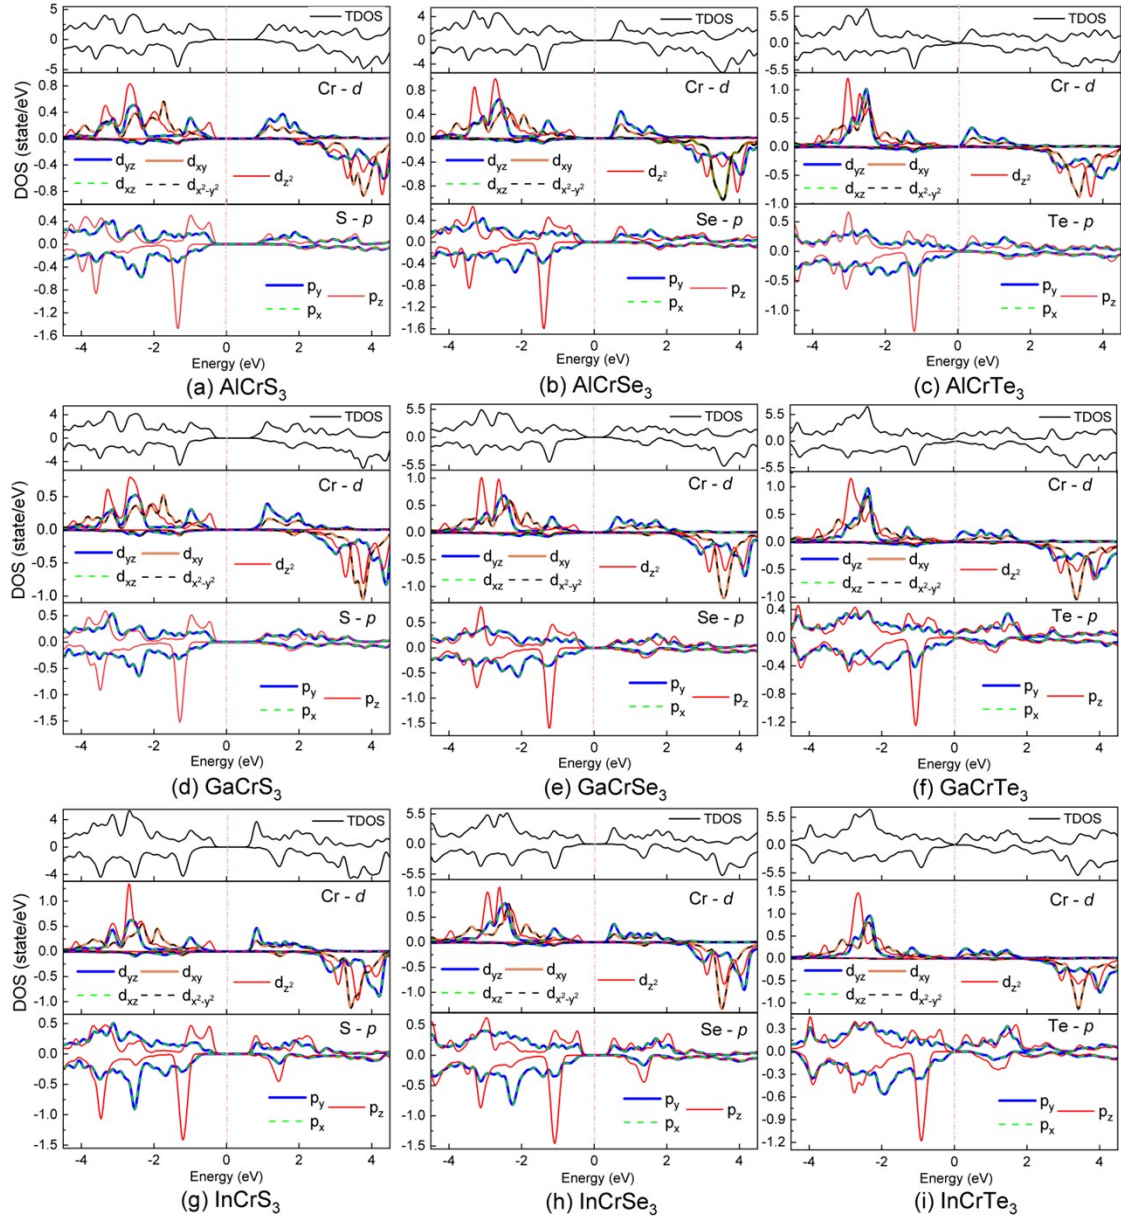

**Figure S4.** Total DOS and corresponding PDOS of monolayer AlCrS<sub>3</sub>, AlCrSe<sub>3</sub>, AlCrTe<sub>3</sub>, GaCrS<sub>3</sub>, GaCrSe<sub>3</sub>, GaCrTe<sub>3</sub>, InCrS<sub>3</sub>, InCrSe<sub>3</sub>, InCrTe<sub>3</sub>, respectively. The vertical dashed line represents the Fermi level which is set as zero.

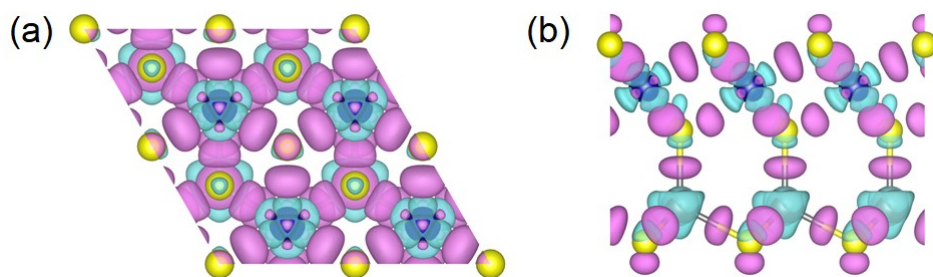

**Figure S5.** The (a) top and (b) side view of deformation charge density distribution of the AlCrS<sub>3</sub> monolayer. The value of the isosurface is 0.003 e/bohr<sup>3</sup>. The silver, blue and yellow balls represent Al, Cr and S atoms, respectively.

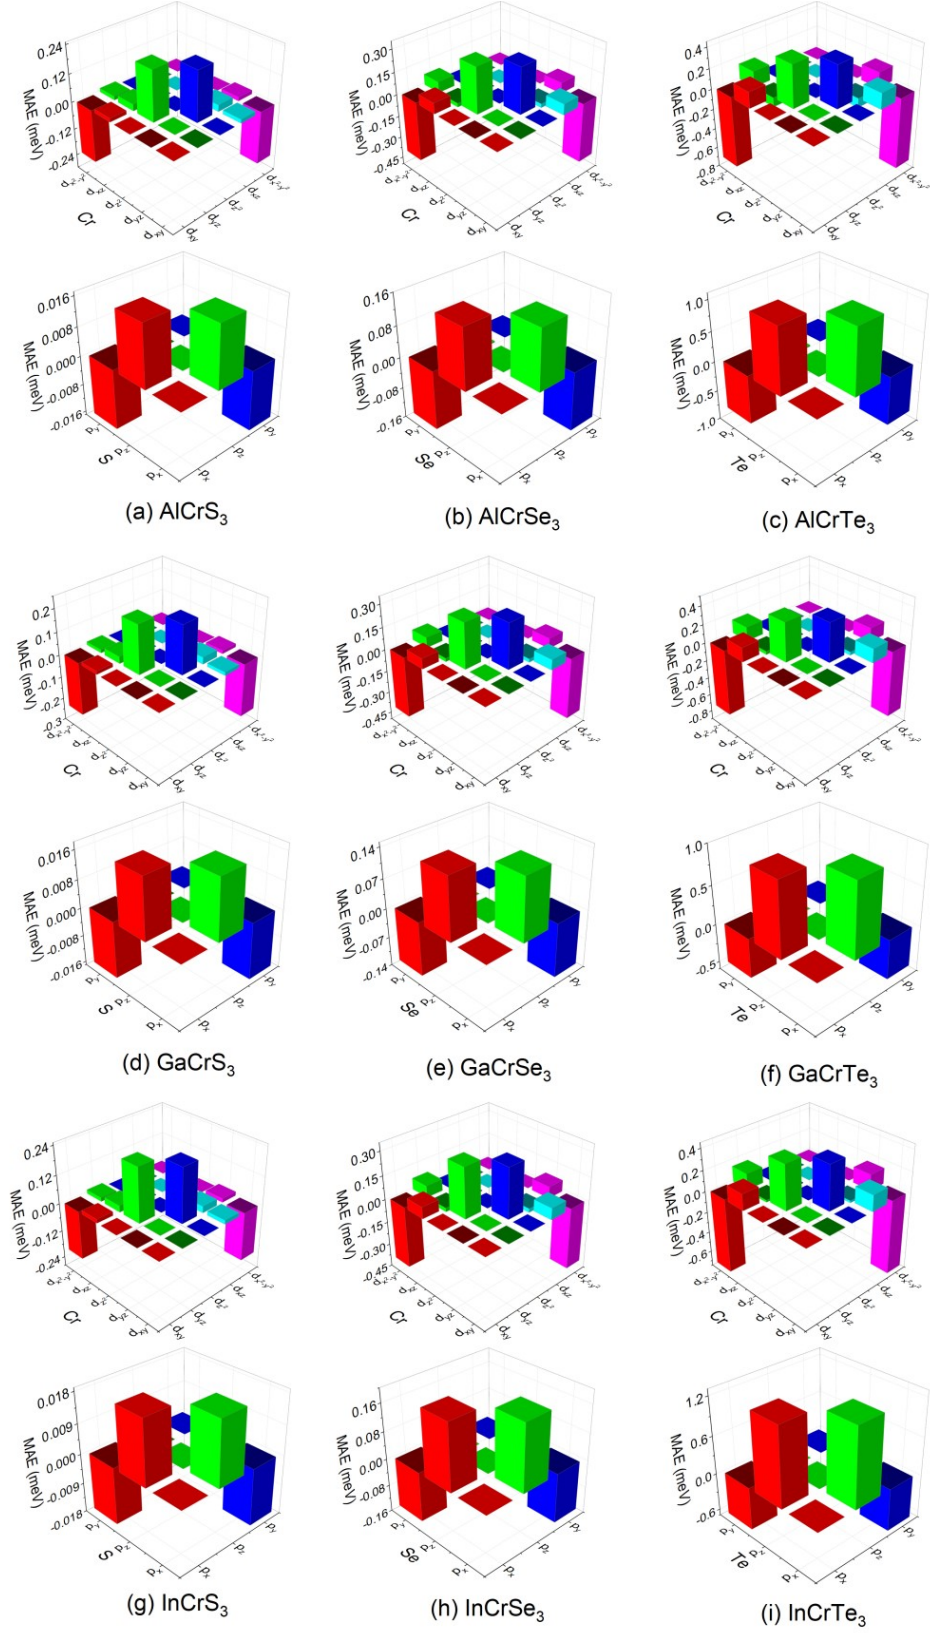

**Figure S6.** (a)-(i) are the orbital-projected contribution to MAE from the SOC interaction for AlCrS<sub>3</sub>, AlCrSe<sub>3</sub>, AlCrTe<sub>3</sub>, GaCrS<sub>3</sub>, GaCrSe<sub>3</sub>, GaCrTe<sub>3</sub>, InCrS<sub>3</sub>, InCrSe<sub>3</sub>, InCrTe<sub>3</sub>, respectively.



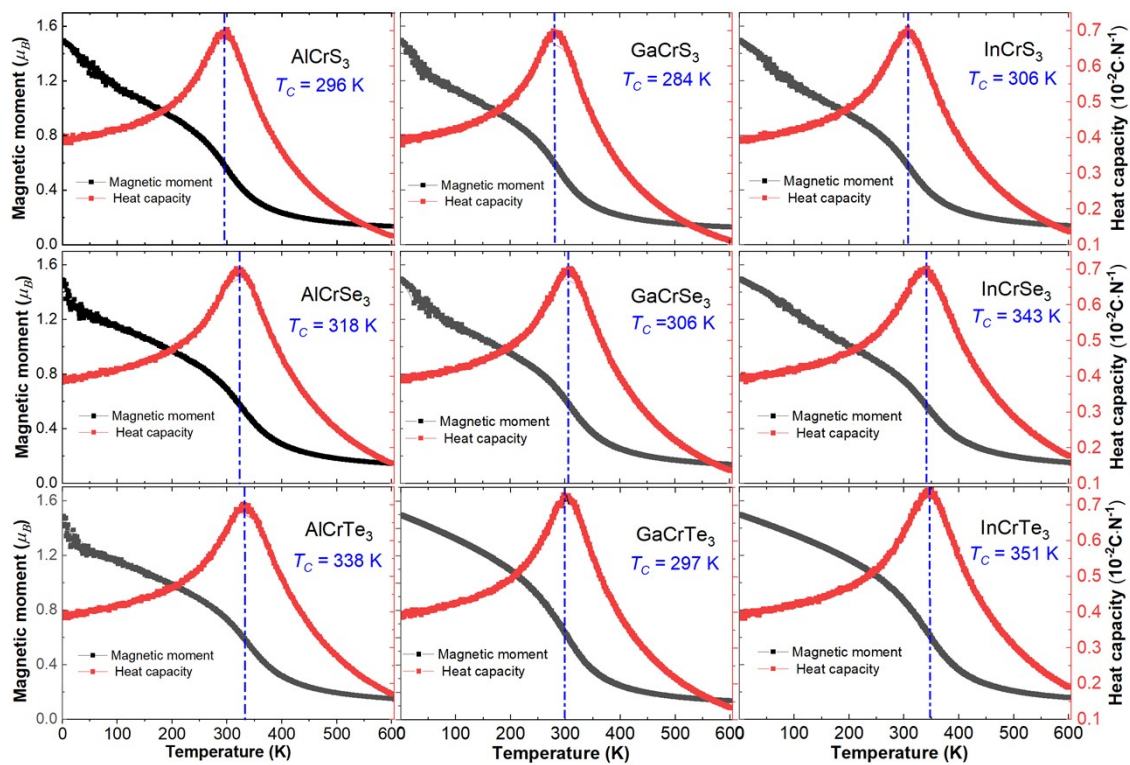

**Figure S7.** Magnetic moment and specific heat capacity as a function of temperature by Monte Carlo simulations.

**Table S1.** The total energies per cellof monolayer  $X\text{CrY}_3$  with different magnetic configurations at the GGA+ U level, including FM, zigzag AFM (z-AFM), stripe AFM (s-AFM), and  $120^\circ$  noncollinear AFM (n-AFM).

| $X\text{CrY}_3$     | $E_{\text{FM}}/\text{eV}$ | $E_{\text{z-AFM}}/\text{eV}$ | $E_{\text{s-AFM}}/\text{eV}$ | $E_{\text{n-AFM}}/\text{eV}$ |
|---------------------|---------------------------|------------------------------|------------------------------|------------------------------|
| AlCrS <sub>3</sub>  | -27.72                    | -27.62                       | -27.61                       | -27.60                       |
| AlCrSe <sub>3</sub> | -24.99                    | -24.87                       | -24.86                       | -24.85                       |
| AlCrTe <sub>3</sub> | -22.09                    | -22.05                       | -22.02                       | -22.03                       |
| GaCrS <sub>3</sub>  | -25.94                    | -25.85                       | -25.84                       | -25.83                       |
| GaCrSe <sub>3</sub> | -23.53                    | -23.47                       | -23.44                       | -23.43                       |
| GaCrTe <sub>3</sub> | -21.01                    | -20.99                       | -20.97                       | -20.98                       |
| InCrS <sub>3</sub>  | -25.07                    | -24.90                       | -24.90                       | -24.89                       |
| InCrSe <sub>3</sub> | -22.92                    | -22.78                       | -22.77                       | -22.76                       |
| InCrTe <sub>3</sub> | -20.59                    | -20.52                       | -20.50                       | -20.50                       |
